# Supplementary material
Source: PubMed Central journal article supplement (PMC4142627)

---

## Supporting Information

### Facile Synthesis of ( $\pm$ )-Paeonilide

Yuguo Du\*<sup>1</sup>, Jun Liu<sup>1</sup> and Robert J. Linhardt<sup>2</sup>

<sup>1</sup>State Key Laboratory of Environmental Chemistry and Ecotoxicology, Research Center for Eco-Environmental Sciences, Chinese Academy of Sciences, Beijing 100085, China, and <sup>2</sup>Departments of Chemistry, Biology, and Chemical and Biological Engineering, Rensselaer Polytechnic Institute, Troy, New York 12180, USA

#### Table of Contents

|                                                                            |    |
|----------------------------------------------------------------------------|----|
| General methods                                                            | S2 |
| <sup>1</sup> H and <sup>13</sup> C NMR spectra for compound <b>5</b>       | S3 |
| <sup>1</sup> H and <sup>13</sup> C NMR spectra for compound <b>8</b>       | S4 |
| <sup>1</sup> H, <sup>13</sup> C NMR and HRMS spectra for compound <b>3</b> | S5 |
| <sup>1</sup> H, <sup>13</sup> C NMR and HRMS spectra for compound <b>2</b> | S6 |
| <sup>1</sup> H, <sup>13</sup> C NMR and HRMS spectra for compound <b>1</b> | S7 |

#### Experimental Section

**General methods:** Optical rotations were determined at 25 °C with an automatic polarimeter.  $^1\text{H}$ ,  $^{13}\text{C}$  NMR spectra were recorded with a 400 MHz spectrometer for solutions in  $\text{CDCl}_3$ . Mass spectra were measured using QTOF mass spectrometer.

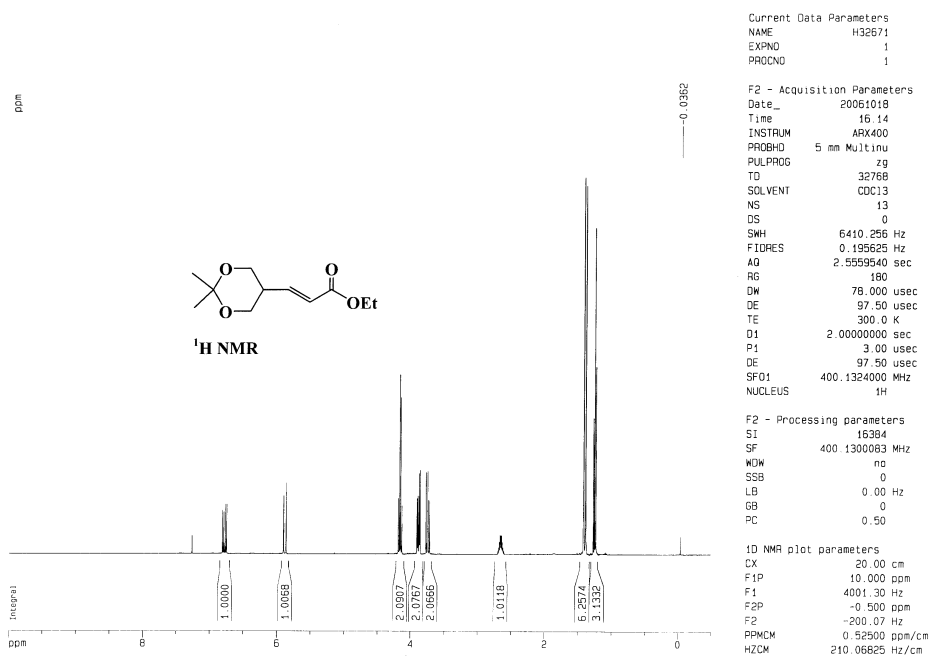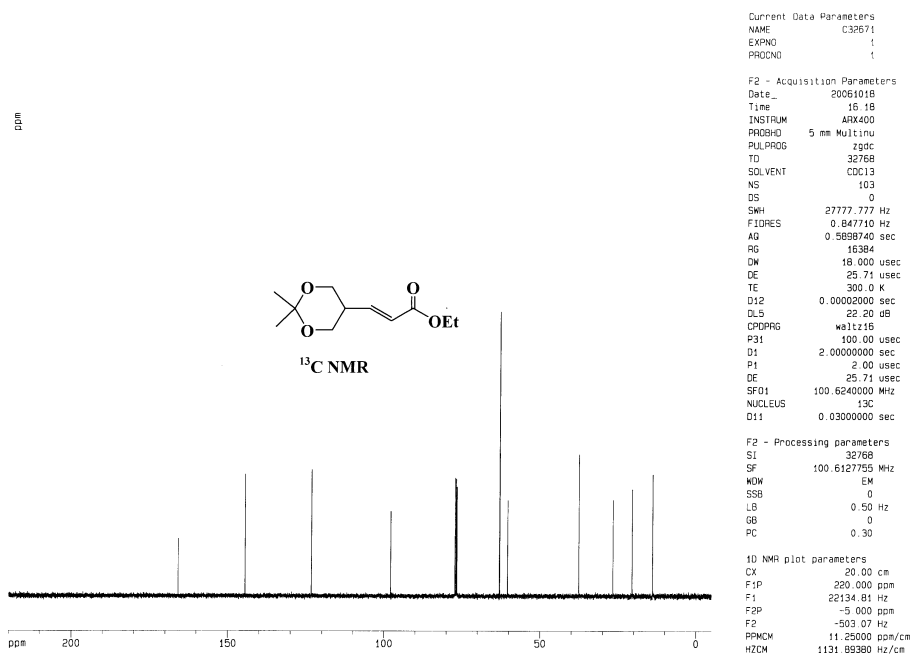

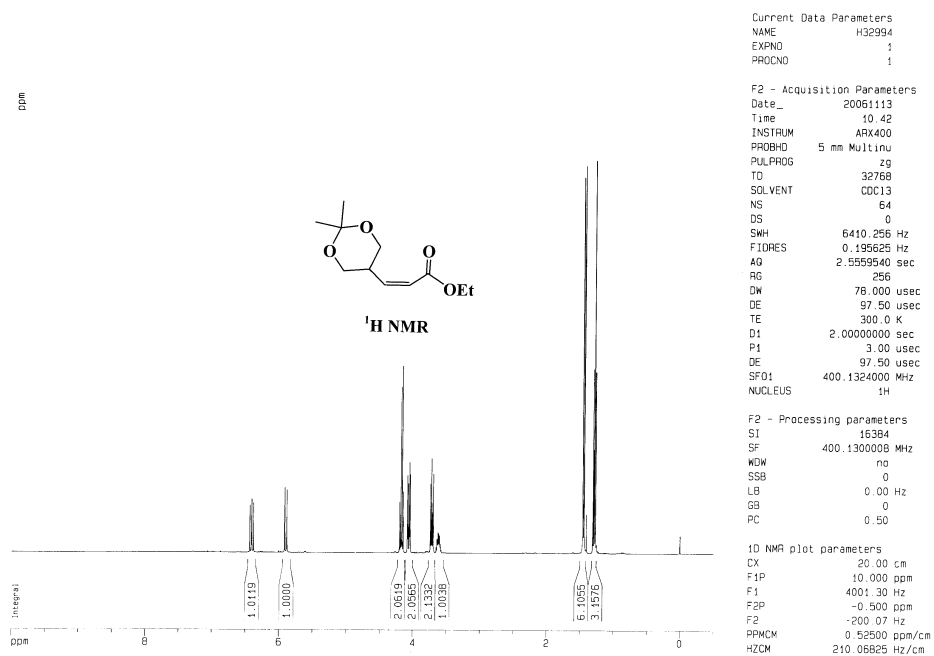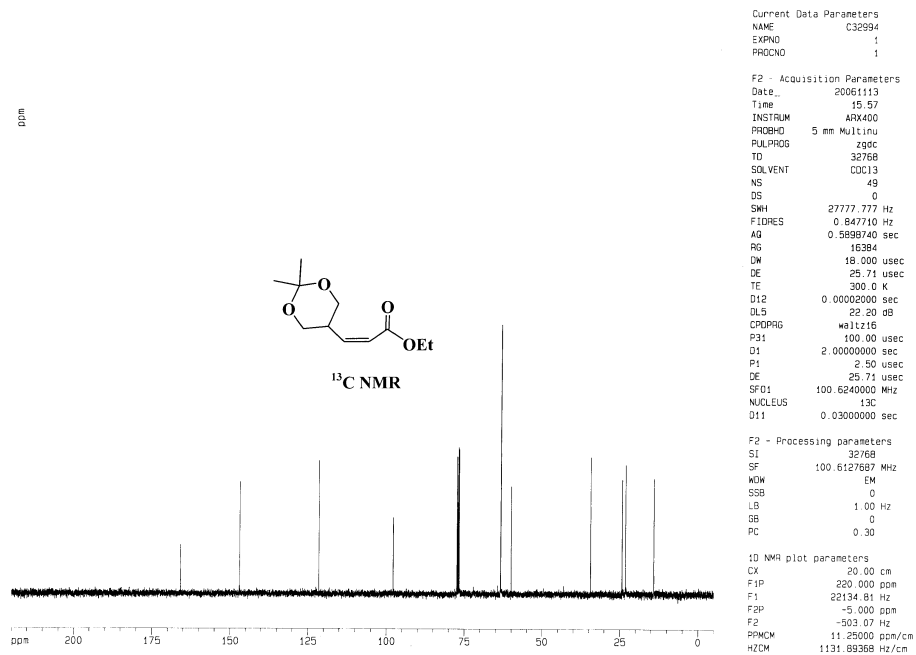

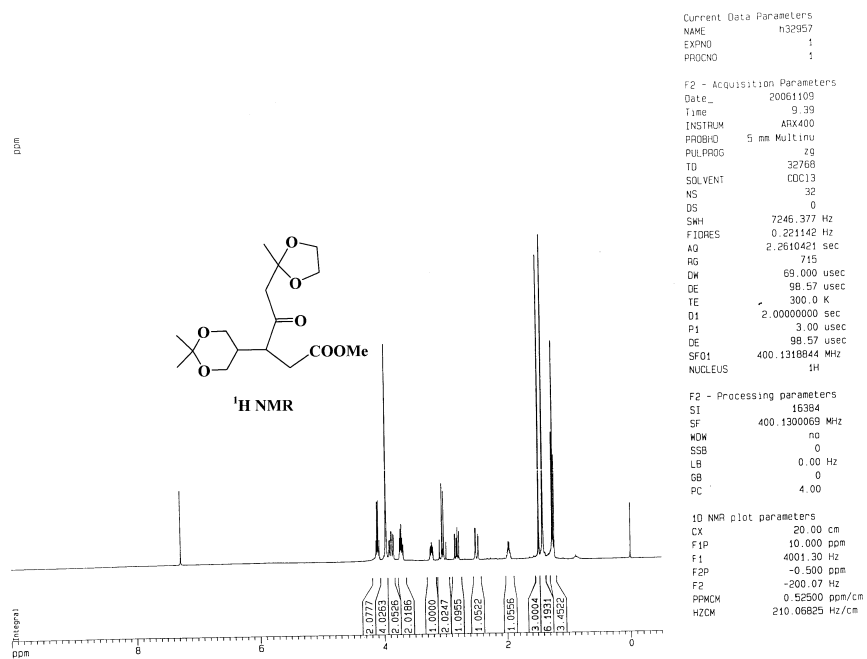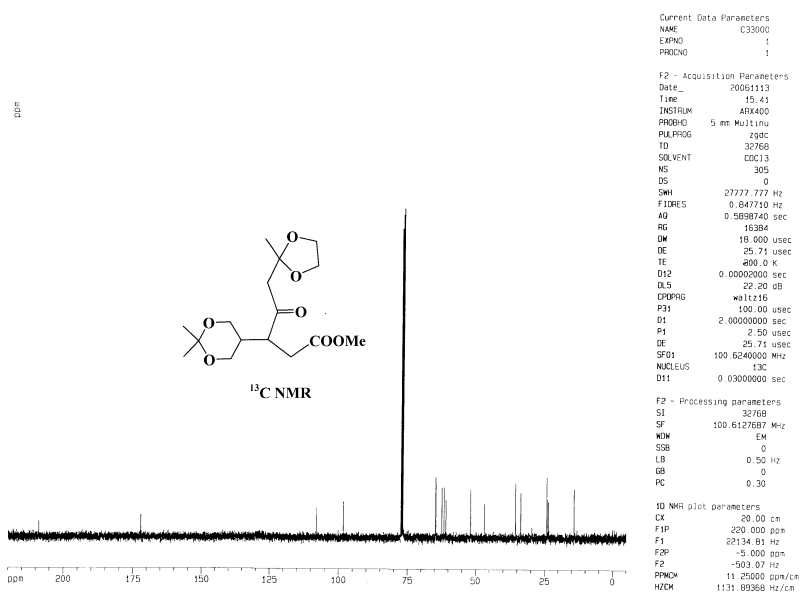

LIUJUN\_PA3 31 (0.574) Cm (28:33)

TOF MS ES+  
1.93e3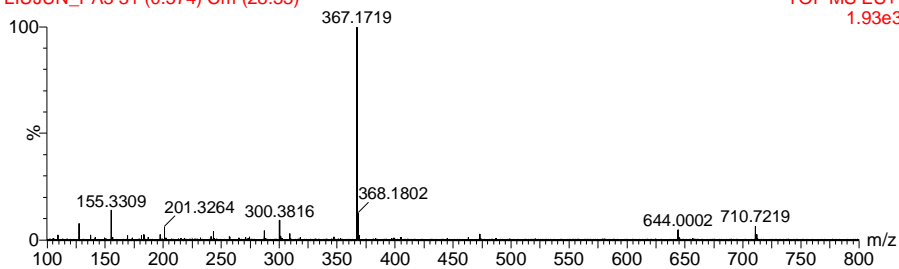

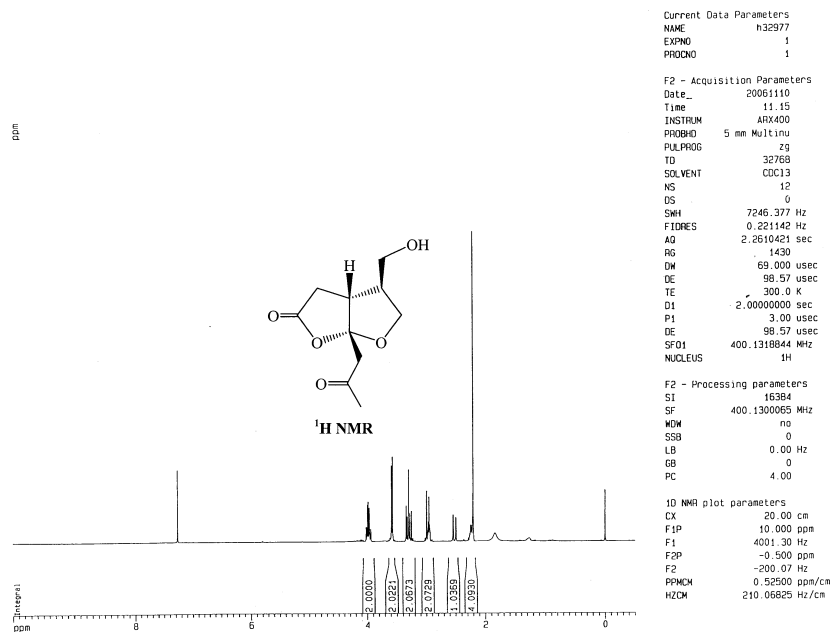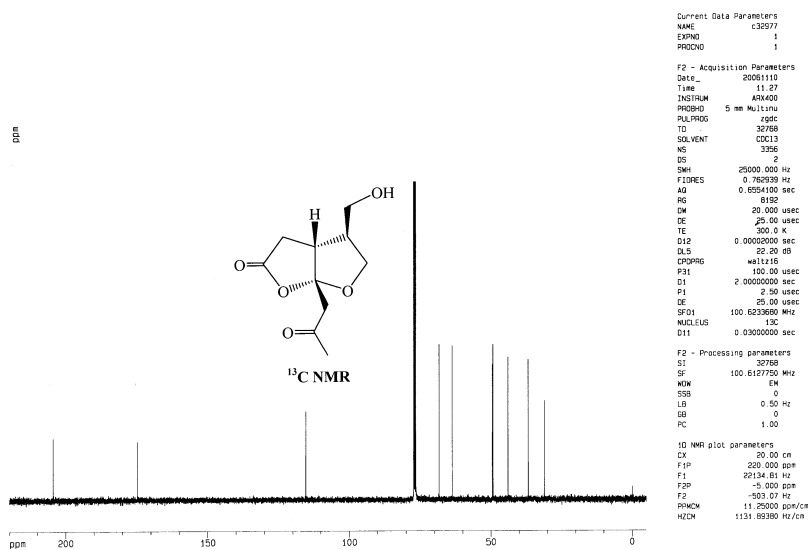

LIUJUN\_PA2 37 (0.686) Cm (31:37)

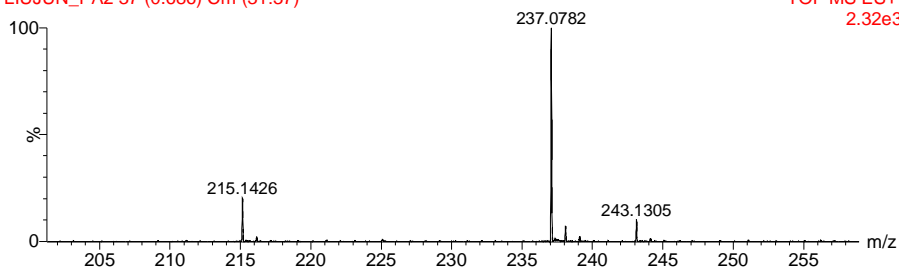

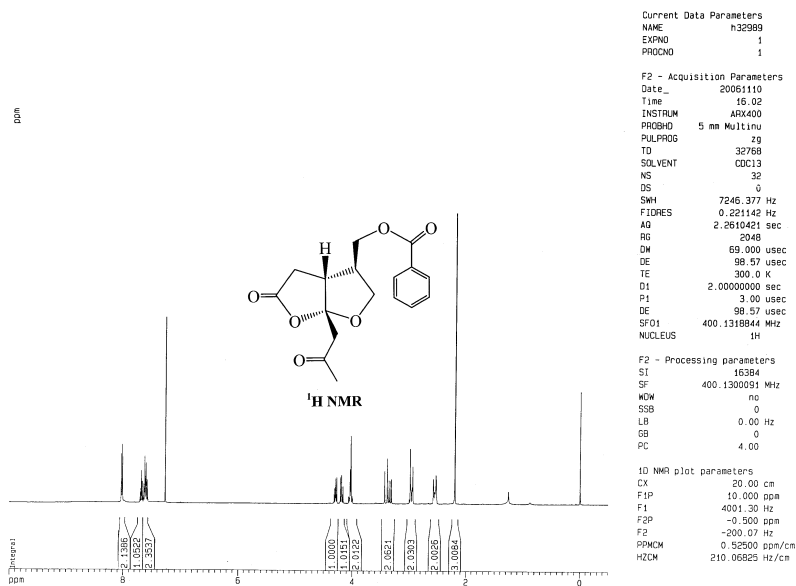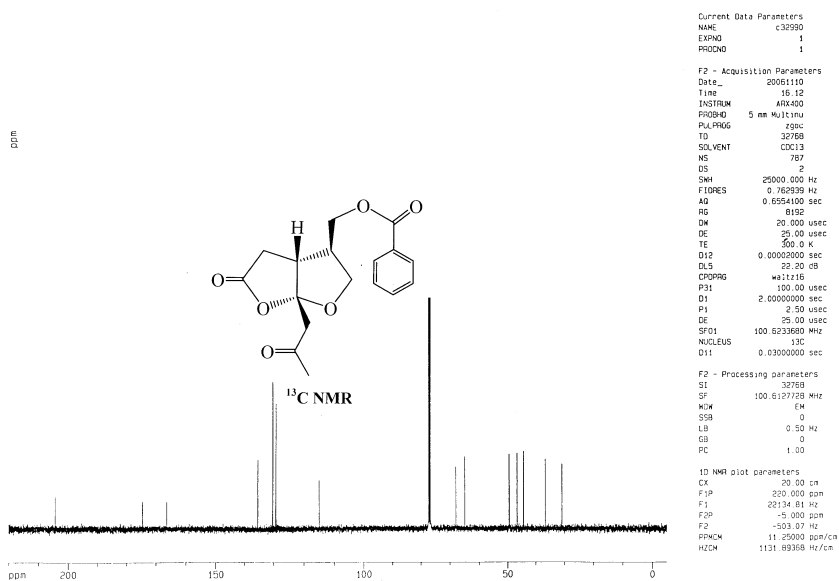

LIUJUN\_PA1 72 (1.334) Cm (55:73)

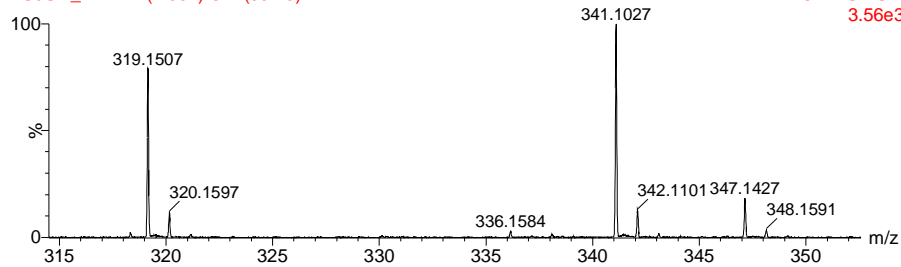

Supplement: NIHMS75554-supplement-Supplementary_data.pdf [file NIHMS75554-supplement-Supplementary_data.pdf]
